# Supplementary material for: What is known about nurse retention in peri-COVID-19 and post-COVID-19 work environments: protocol for a scoping review of factors, strategies and interventions
Source: PubMed Central journal article supplement — BMJ Open. 2024 Sep 24;14(9):e087948. doi: 10.1136/bmjopen-2024-087948 (PMC11423726; doi:10.1136/bmjopen-2024-087948), 2024-09-24
Supplement: bmjopen-14-9-s001.pdf [file bmjopen-14-9-s001.pdf]

# Appendices

## Appendix A: Data extraction instrument (draft)

Data extraction instrument for study characteristics.

| Author(s),<br>year,<br>country | Sample<br>Description | Study<br>Design | Factors,<br>Strategies, or<br>Interventions | Retention<br>measured? | Measurement<br>Scale | Measurement | Mixed<br>Methods<br>Appraisal<br>Tool<br>(MMAT)<br>Score |
|--------------------------------|-----------------------|-----------------|---------------------------------------------|------------------------|----------------------|-------------|----------------------------------------------------------|
|--------------------------------|-----------------------|-----------------|---------------------------------------------|------------------------|----------------------|-------------|----------------------------------------------------------|

Data extraction instrument for factors related to nurse retention.

| Author(s) | Number of nurses | Factors associated with<br>retention |
|-----------|------------------|--------------------------------------|
|-----------|------------------|--------------------------------------|

Data extraction instrument for strategies to improve nurse retention.

| Author(s) | Strategies for nurse retention |
|-----------|--------------------------------|
|-----------|--------------------------------|

Data extraction instrument for interventions to improve nurse retention.

| Author(s) | Sample | Intervention | Outcome(s) |
|-----------|--------|--------------|------------|
|-----------|--------|--------------|------------|

Appendix B: Search strategy (draft)

*Example Search Strategy for MEDLINE (OVID):*

| Set       | Search Statement                                                                   |
|-----------|------------------------------------------------------------------------------------|
| <b>1</b>  | exp Nurses/                                                                        |
| <b>2</b>  | (nurs*).tw,kf                                                                      |
| <b>3</b>  | 1 OR 2                                                                             |
| <b>4</b>  | exp Personnel Turnover/                                                            |
| <b>5</b>  | ((personnel adj3 turnover) OR (turnover)).tw,kf                                    |
| <b>6</b>  | (retention or retain*).tw,kf.                                                      |
| <b>7</b>  | ((intent OR intending) adj3 (stay OR leave)).tw,kf                                 |
| <b>8</b>  | (quit or quitting).tw,kf.                                                          |
| <b>9</b>  | 4 OR 5 OR 6 OR 7 OR 8                                                              |
| <b>10</b> | exp COVID-19/                                                                      |
| <b>11</b> | (COVID-19 or corona* or pandemic or coronavirus or SARS-CoV-2 or 2019-CoV-2).tw,kf |
| <b>12</b> | 10 or 11                                                                           |
| <b>13</b> | 3 AND 9 AND 12                                                                     |

*Search Date: April 1, 2024*

*Number of Hits: 637*
